# Supplementary material for: Propionibacterium acnes CAMP Factor and Host Acid Sphingomyelinase Contribute to Bacterial Virulence: Potential Targets for Inflammatory Acne Treatment
Source: PubMed Central journal article supplement (PMC3075254; doi:10.1371/journal.pone.0014797), 2011-04-12
Supplement: pone.0014797.s002.pdf [file pone.0014797.s002.pdf]

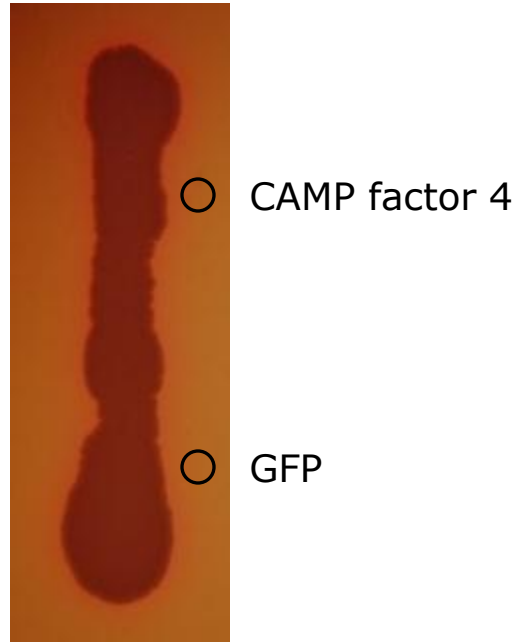

Figure S1
